# Supplementary material
Source: PubMed Central journal article supplement (PMC4594770)

thickness of the tissue at this stage, except *Wnt7b* which is expressed throughout the hem but whose cortical expression is restricted to the outermost cells (pial edge) in the cortex.

**Supplementary Figure 1. Expression patterns of *Wnts -2b, 3a, -5a, 7a* and *7b* in *Wnt8b*<sup>-/-</sup> embryos and wild type controls.** In situ hybridisation for each of the *Wnt* genes whose expression overlaps that of *Wnt8b* in the dorsomedial telencephalon of E12.5 embryos. Panels A,C,E,G,I show wild type embryos and panels B,D,F,H,J show equivalent sections of *Wnt8b*<sup>-/-</sup> embryos.

**Supplementary Figure 1**

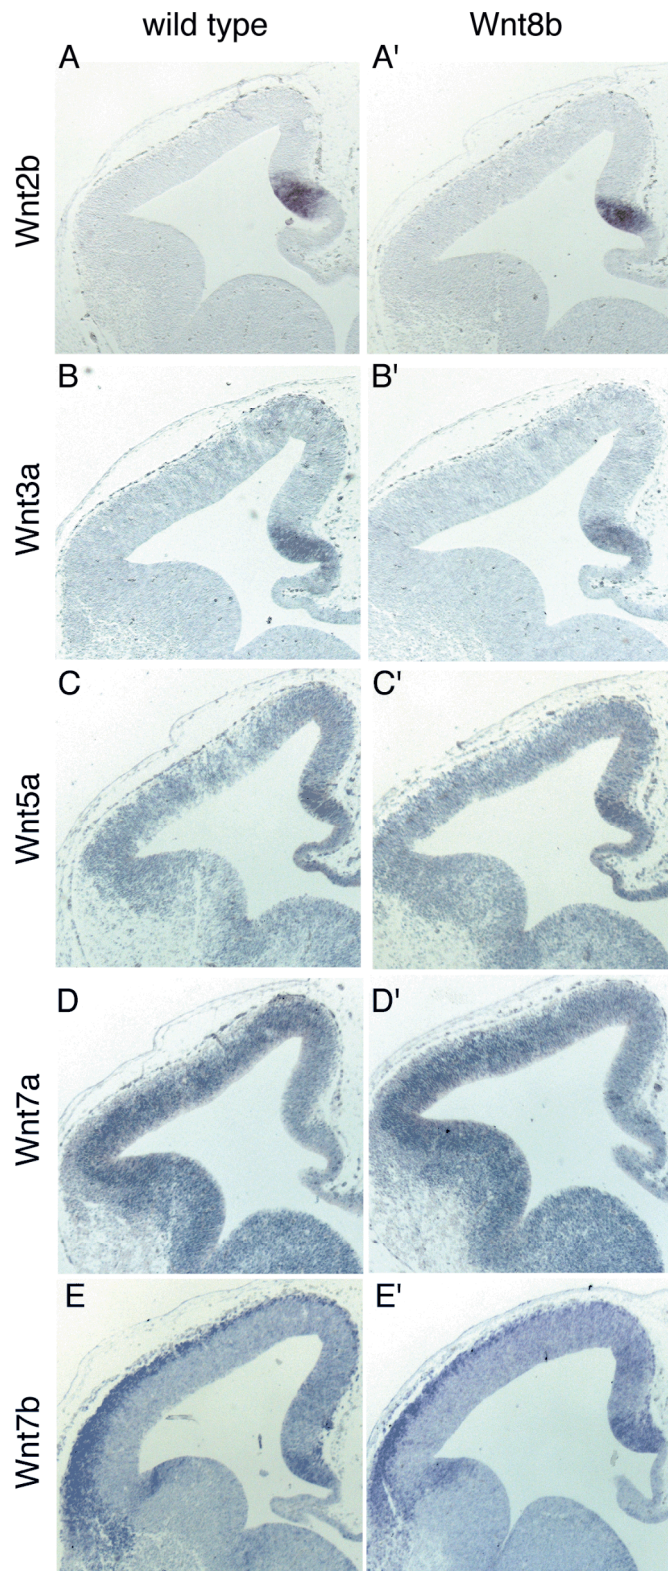

Supplement: NIHMS65307-supplement-01.pdf [file NIHMS65307-supplement-01.pdf]
